# Supplementary material for: Determination of Microcystins in Fish Tissue by ELISA and MALDI-TOF MS Using a Highly Specific Single Domain Antibody
Source: MDPI journal article supplement (doi:10.3390/toxins15020084), 2023-01-17
Supplement: s1 [file s1]

Supplementary file

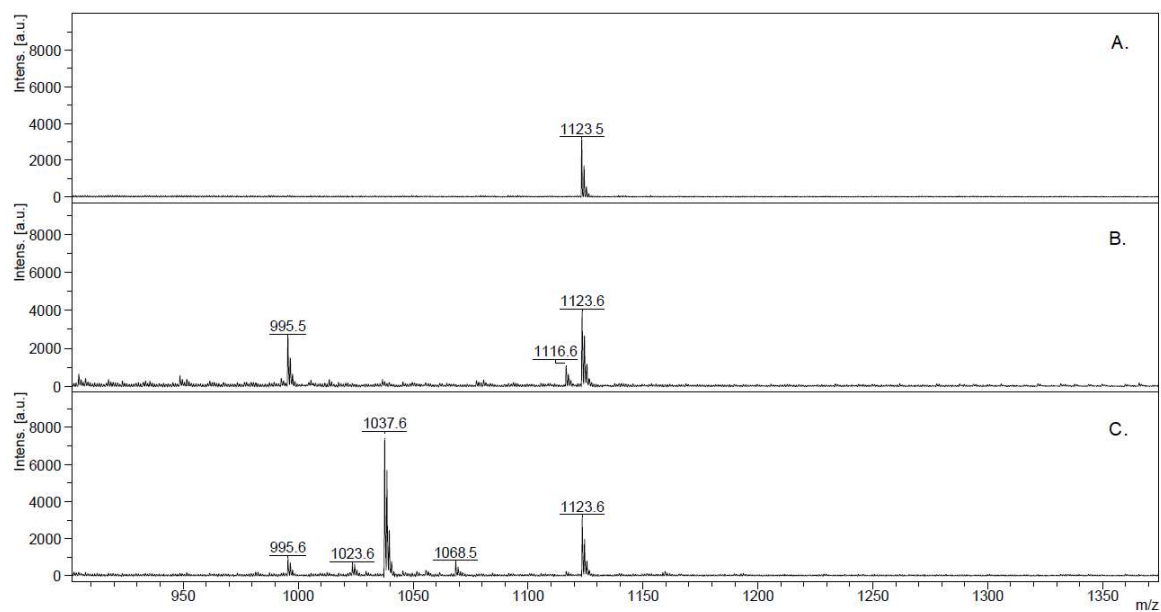

**Figure S1.** Nb-QMALDI MS of the fish samples. Typical spectra of the analyzed fish samples from Palmar in both campaigns. Extended m/z range of the spectra shown in Figure 4. (A) Unexposed fish (LMB); (B) February 2017 sample with MCs: m/z = 995.5 and 1116.6 (which correspond to the single protonated ion of MC-LR and MC-LR-Cys); (C) March 2021 sample with MCs: m/z = 995.6, 1023.6, 1037.6, and 1068.5 (which correspond to MC-LR, [D-Leu1,Dha7] MC-LR, [D-Leu1] MC-LR, and MC-WR, respectively).

**Table S1.** Data of the MC results in fish by Nb-ELISA and Nb-QMALDI MS (2017 and 2021).

| 2017<br>Sample ID | Nb-ELISA—<br>ng/g Fish | Nb-QMALDI (Total<br>MCs—ng/g Fish) | 2021<br>Sample ID | Nb-ELISA—<br>ng/g Fish | Nb-QMALDI (Total<br>MCs—ng/g fish) |
|-------------------|------------------------|------------------------------------|-------------------|------------------------|------------------------------------|
| 1                 | 168.65                 | 61.25                              | 1                 | 167.03                 | 89.89                              |
| 2                 | 9.47                   | 1.62                               | 2                 | 275.74                 | 184.17                             |
| 3                 | 105.53                 | 84.02                              | 3                 | 304.85                 | 191.39                             |
| 4                 | 14.71                  | 2.76                               | 4                 | 79.43                  | 50.10                              |
| 5                 | 1.18                   | 0.42                               | 5                 | 81.44                  | 48.15                              |
| 6                 | 34.18                  | 13.43                              | 6                 | 59.80                  | 35.88                              |
| 7                 | 23.12                  | 17.04                              | 7                 | 11.02                  | 4.55                               |
| 8                 | 1.18                   | 1.43                               | 8                 | 43.49                  | 19.24                              |
| 9                 | 13.71                  | 7.31                               | 9                 | 19.54                  | 12.18                              |
| 10                | 62.18                  | 50.53                              | 10                | 43.61                  | 6.02                               |
| 11                | 31.18                  | 21.10                              | 11                | 1.18                   | 0.42                               |
| 12                | 11.71                  | 9.74                               | 12                | 25.36                  | 11.30                              |
| 13                | 3.71                   | 3.78                               | 13                | 20.68                  | 10.72                              |
| 14                | 5.88                   | 2.12                               | 14                | 11.61                  | 6.92                               |
| 15                | 20.18                  | 12.13                              | 15                | 12.00                  | 3.66                               |
| 16                | 57.76                  | 38.20                              | 16                | 4.68                   | 32.43                              |
| 17                | 2.88                   | 0.84                               | 17                | 47.46                  | 32.14                              |
| 18                | 1.18                   | 0.42                               | 18                | 11.48                  | 5.12                               |
| 19                | 7.29                   | 1.39                               | 19                | 25.75                  | 18.94                              |
| 20                | 1.80                   | 1.22                               | 20                | 30.17                  | 28.14                              |
| 21                | 1.18                   | 0.42                               | 21                | 31.47                  | 31.71                              |
| 22                | 1.18                   | 0.42                               | 22                | 64.59                  | 64.45                              |
| 23                | 26.86                  | 27.62                              | 23                | 59.73                  | 63.83                              |
| 24                | 1.18                   | 0.42                               | 24                | 23.61                  | 16.53                              |
| 25                | 1.50                   | 0.62                               | 25                | 3.24                   | 2.58                               |
| 26                | 1.18                   | 0.42                               | 26                | 15.95                  | 19.20                              |
|                   |                        |                                    | 27                | 42.49                  | 32.99                              |
|                   |                        |                                    | 28                | 3.22                   | 2.79                               |
|                   |                        |                                    | 29                | 1.18                   | 0.42                               |
